# Supplementary material for: Interprofessional collaboration on oral health for frail home-dwelling older people: a focus group study exploring the perspectives of home nurses, home care aides and cleaning aides
Source: Research Square preprint supplement (doi:10.21203/rs.3.rs-8396075/v1), 2026-01-19
Supplement: Supplementary file 1 [file 21acd5224566fd36a952a7d1.pdf]

## 1 Additional file 1 – COREQ Checklist

| No                                             | Item                                     | Guide question/description                                  | Answer                                                                                                                                         |
|------------------------------------------------|------------------------------------------|-------------------------------------------------------------|------------------------------------------------------------------------------------------------------------------------------------------------|
| <b>Domain 1: Research team and reflexivity</b> |                                          |                                                             |                                                                                                                                                |
| Personal Characteristics                       |                                          |                                                             |                                                                                                                                                |
| 1                                              | Interviewer/facilitator                  | Which author(s) conducted the interview or focus group?     | <i>See methods – data collection.</i>                                                                                                          |
| 2                                              | Credentials                              | What were the researcher's credentials? e.g. PhD, MD        | <i>The first author is a PhD student.</i>                                                                                                      |
| 3                                              | Occupation                               | What was their occupation at the time of the study?         | <i>The first author worked as a researcher at the time of the study, with a background in speech therapy and health policy and management.</i> |
| 4                                              | Gender                                   | Was the researcher male or female?                          | <i>The researcher is female.</i>                                                                                                               |
| 5                                              | Experience and training                  | What experience or training did the researcher have?        | <i>See methods – data collection.</i>                                                                                                          |
| Relationship with participants                 |                                          |                                                             |                                                                                                                                                |
| 6                                              | Relationship established                 | Was a relationship established prior to study commencement? | <i>No, the participants were only recruited for this study.</i>                                                                                |
| 7                                              | Participant knowledge of the interviewer | What did the participants know about the researcher? e.g.   | <i>The interviewer, her occupation and</i>                                                                                                     |

|                               |                                       |                                                                                                                                                                 |                                                                                                                                        |
|-------------------------------|---------------------------------------|-----------------------------------------------------------------------------------------------------------------------------------------------------------------|----------------------------------------------------------------------------------------------------------------------------------------|
|                               |                                       | <i>personal goals, reasons for doing the research</i>                                                                                                           | <i>background were briefly introduced at the beginning of the focus groups. See additional file 2 and 3.</i>                           |
| 8                             | Interviewer characteristics           | What characteristics were reported about the interviewer/facilitator? e.g. <i>bias, assumptions, reasons and interests in the research topic</i>                | <i>The interviewer and her motivation were briefly introduced at the beginning of the focus groups. See – additional file 2 and 3.</i> |
| <b>Domain 2: study design</b> |                                       |                                                                                                                                                                 |                                                                                                                                        |
| Theoretical framework         |                                       |                                                                                                                                                                 |                                                                                                                                        |
| 9                             | Methodological orientation and theory | What methodological orientation was stated to underpin the study? e.g. <i>grounded theory, discourse analysis, ethnography, phenomenology, content analysis</i> | <i>See methods – data analysis.</i>                                                                                                    |
| Participant selection         |                                       |                                                                                                                                                                 |                                                                                                                                        |
| 10                            | Sampling                              | How were participants selected? e.g. <i>purposive, convenience, consecutive, snowball</i>                                                                       | <i>See methods – participants.</i>                                                                                                     |
| 11                            | Method of approach                    | How were participants approached? e.g. <i>face-to-face, telephone, mail, email</i>                                                                              | <i>See methods – participants.</i>                                                                                                     |

|                 |                             |                                                                                                 |                                                        |
|-----------------|-----------------------------|-------------------------------------------------------------------------------------------------|--------------------------------------------------------|
| 12              | Sample size                 | How many participants were in the study?                                                        | <i>See results.</i>                                    |
| 13              | Non-participation           | How many people refused to participate or dropped out?<br><br>Reasons?                          | <i>N/A.</i>                                            |
| Setting         |                             |                                                                                                 |                                                        |
| 14              | Setting of data collection  | Where was the data collected?<br><br><i>e.g. home, clinic, workplace</i>                        | <i>See methods – data collection.</i>                  |
| 15              | Presence of nonparticipants | Was anyone else present besides the participants and researchers?                               | <i>No.</i>                                             |
| 16              | Description of sample       | What are the important characteristics of the sample?<br><br><i>e.g. demographic data, date</i> | <i>See Table 2.</i>                                    |
| Data collection |                             |                                                                                                 |                                                        |
| 17              | Interview guide             | Were questions, prompts, guides provided by the authors?<br><br>Was it pilot tested?            | <i>See methods – data collection.</i>                  |
| 18              | Repeat interviews           | Were repeat interviews carried out? If yes, how many?                                           | <i>No.</i>                                             |
| 19              | Audio/visual recording      | Did the research use audio or visual recording to collect the data?                             | <i>Audio recording. See methods – data collection.</i> |
| 20              | Field notes                 | Were field notes made during and/or after the interview or focus group?                         | <i>Yes. See methods – data collection.</i>             |

|                                        |                                |                                                                                   |                                                            |
|----------------------------------------|--------------------------------|-----------------------------------------------------------------------------------|------------------------------------------------------------|
| 21                                     | Duration                       | What was the duration of the interviews or focus group?                           | <i>See results.</i>                                        |
| 22                                     | Data saturation                | Was data saturation discussed?                                                    | <i>Yes. See methods – data collection.</i>                 |
| 23                                     | Transcripts returned           | Were transcripts returned to participants for comment and/or correction?          | <i>No.</i>                                                 |
| <b>Domain 3: analysis and findings</b> |                                |                                                                                   |                                                            |
| Data analysis                          |                                |                                                                                   |                                                            |
| 24                                     | Number of data coders          | How many data coders coded the data?                                              | <i>See methods – data analysis.</i>                        |
| 25                                     | Description of the coding tree | Did authors provide a description of the coding tree?                             | <i>No.</i>                                                 |
| 26                                     | Derivation of themes           | Were themes identified in advance or derived from the data?                       | <i>Derived from the data. See methods – data analysis.</i> |
| 27                                     | Software                       | What software, if applicable, was used to manage the data?                        | <i>Nvivo 14. See methods – data analysis.</i>              |
| 28                                     | Participant checking           | Did participants provide feedback on the findings?                                | <i>No.</i>                                                 |
| Reporting                              |                                |                                                                                   |                                                            |
| 29                                     | Quotations presented           | Were participant quotations presented to illustrate the themes/findings? Was each | <i>Yes, see results.</i>                                   |

|    |                                     |                                                                                      |                                                         |
|----|-------------------------------------|--------------------------------------------------------------------------------------|---------------------------------------------------------|
|    |                                     | quotation identified? e.g.<br><i>participant number</i>                              |                                                         |
| 30 | Data and findings<br><br>consistent | Was there consistency between<br><br>the data presented and the<br><br>findings?     | <i>See results.</i>                                     |
| 31 | Clarity of major<br><br>themes      | Were major themes clearly<br><br>presented in the findings?                          | <i>Yes. See results, discussion<br/>and conclusion.</i> |
| 32 | Clarity of minor<br><br>themes      | Is there a description of diverse<br><br>cases or discussion of minor<br><br>themes? | <i>Yes. See results, discussion<br/>and conclusion.</i> |
