# Supplementary material for: Interprofessional collaboration on oral health for frail home-dwelling older people: a focus group study exploring the perspectives of home nurses, home care aides and cleaning aides
Source: Research Square preprint supplement (doi:10.21203/rs.3.rs-8396075/v1), 2026-01-19
Supplement: Supplementary file 3 [file e81c10526304f1899f819f64.pdf]

## Additional file 2 – Interview guide – Home nurses and home care aides

|                           |                                                                                                                                                                                                                                                                                                                                                                                                                                                                                                                                                                                                                                                                                                               |
|---------------------------|---------------------------------------------------------------------------------------------------------------------------------------------------------------------------------------------------------------------------------------------------------------------------------------------------------------------------------------------------------------------------------------------------------------------------------------------------------------------------------------------------------------------------------------------------------------------------------------------------------------------------------------------------------------------------------------------------------------|
| Introduction              | <ul style="list-style-type: none"> <li>- Welcome participants</li> <li>- Presentation of the interviewer: I am Natalie Hoste, at this moment, I work as a researcher and PhD student for Ghent University. I am a trained speech therapist and subsequently obtained a master's degree in healthcare management and policy. Driven by my passion for care processes and my fondness for elderly care, I wanted to take part in this project.</li> <li>- Explanation of the study and its purpose</li> <li>- Explanation of several concepts (e.g. what we mean by frail home-dwelling older people)</li> <li>- Explanation of the informed consent form and the demographic data collection sheet.</li> </ul> |
| Start recording           |                                                                                                                                                                                                                                                                                                                                                                                                                                                                                                                                                                                                                                                                                                               |
| Importance of Oral health | <p>What role and significance does oral health hold within your job as a home nurse / home care aide?</p> <ul style="list-style-type: none"> <li>- What makes this important or less important?</li> <li>- Has this always been the case? What has contributed to any changes?</li> </ul> <p>How do you perceive the oral health of FHOP you visit at home?</p> <ul style="list-style-type: none"> <li>- Do you believe this patient group considers their oral health important?</li> </ul> <p>How important do you feel your own oral health is?</p>                                                                                                                                                        |

|                           |                                                                                                                                                                                                                                                                                                                                                                                                                                                                                                                                                                                                                                                                                                                                                                                                                                                                                                                                                                                                                                                                                                                                                                                                                                                                                                                                                                                                                                                                                                                                                                                                             |
|---------------------------|-------------------------------------------------------------------------------------------------------------------------------------------------------------------------------------------------------------------------------------------------------------------------------------------------------------------------------------------------------------------------------------------------------------------------------------------------------------------------------------------------------------------------------------------------------------------------------------------------------------------------------------------------------------------------------------------------------------------------------------------------------------------------------------------------------------------------------------------------------------------------------------------------------------------------------------------------------------------------------------------------------------------------------------------------------------------------------------------------------------------------------------------------------------------------------------------------------------------------------------------------------------------------------------------------------------------------------------------------------------------------------------------------------------------------------------------------------------------------------------------------------------------------------------------------------------------------------------------------------------|
| Role of home care workers | <p>Do you think you could play a role in the oral health of FHOP?</p> <ul style="list-style-type: none"> <li>- If so, how do you envisage this?</li> <li>- Who do you think is responsible for the daily oral care of FHOP</li> </ul>                                                                                                                                                                                                                                                                                                                                                                                                                                                                                                                                                                                                                                                                                                                                                                                                                                                                                                                                                                                                                                                                                                                                                                                                                                                                                                                                                                       |
| Professional behaviour    | <ul style="list-style-type: none"> <li>- In what way does oral health come up during patient visits now? <ul style="list-style-type: none"> <li>o To what extent do you <b>help</b> patients with their oral health (e.g. assistance with daily oral hygiene / arranging dental appointments, ...)</li> <li>o To what extent do patients or their family members <b>discuss</b> their oral health / daily oral hygiene / dental visits with you? <ul style="list-style-type: none"> <li>▪ Is this different from other problems experienced by this patient group? What makes this different?</li> </ul> </li> <li>o Do older people sometimes <b>ask you to help</b> them with tasks related to their oral health? Is this feasible for you? What could help you?</li> <li>o Do you sometimes take the <b>initiative to talk about</b> oral health yourselves? <ul style="list-style-type: none"> <li>▪ What prompts you?</li> <li>▪ Which aspects do you cover: the importance of daily oral hygiene, dental visits, brushing instructions, etc.?</li> </ul> </li> </ul> </li> <li>- Are there times when you <b>notice signals indicating</b> that an older person's oral health is not good? (e.g. worn toothbrush, dental prosthesis kept in dirty water,...) <ul style="list-style-type: none"> <li>o What do you do about this? Do you talk to them about it?</li> <li>o No action: What would make it easier to address this?</li> <li>o In case of action: Do patients take action based on your actions? Do you follow up on it during your next contact with the patient?</li> </ul> </li> </ul> |

|                        |                                                                                                                                                                                                                                                                                                                                                                                                                                                                                                                                        |
|------------------------|----------------------------------------------------------------------------------------------------------------------------------------------------------------------------------------------------------------------------------------------------------------------------------------------------------------------------------------------------------------------------------------------------------------------------------------------------------------------------------------------------------------------------------------|
|                        | <ul style="list-style-type: none"> <li>- Are there <b>guidelines</b> for home care providers that address oral health? <ul style="list-style-type: none"> <li>o What potential areas for improvement do you see here?</li> </ul> </li> </ul>                                                                                                                                                                                                                                                                                           |
| Responsibility         | <p>Who do you believe is primarily responsible for...</p> <ul style="list-style-type: none"> <li>- Daily oral care and hygiene for FHOP</li> <li>- Professional oral care for FHOP</li> </ul>                                                                                                                                                                                                                                                                                                                                          |
| Self-efficacy          | <p>To what extent do you feel capable of recognizing oral health issues within FHOP and assisting them with daily oral hygiene?</p> <ul style="list-style-type: none"> <li>- What factors play a role in this?</li> <li>- Where do you obtain the necessary information on this topic?</li> <li>- To what extent have you been trained in this area?</li> <li>- Who can you turn to with questions?</li> <li>- What could assist in this regard?</li> </ul>                                                                            |
| Reactions of FHOP      | <p>When you aim to help FHOP address their oral health (in the broad sense, such as assisting with daily oral hygiene, giving advice, referring to a dentist, etc.), what reactions do you receive from them?</p> <ul style="list-style-type: none"> <li>- How do you react in that case?</li> <li>- What do you believe makes them prefer not to be helped (or, conversely, makes them more willing to accept help)?</li> <li>- What do you think is needed to encourage FHOP to take an active role in their oral health?</li> </ul> |
| Signalling / referring | <p>Do you sometimes discuss it with a family caregiver / supervisor / other healthcare professional when you notice oral health problems in FHOP?</p> <ul style="list-style-type: none"> <li>- How does this work?</li> <li>- What prompts you to do so? Is this different for other health problems?</li> </ul> <p>What reactions do you get when you do this?</p>                                                                                                                                                                    |

|                                                       |                                                                                                                                                                                                                                                                                                                                                                                                                                                                                                                                                                                                                                                                  |
|-------------------------------------------------------|------------------------------------------------------------------------------------------------------------------------------------------------------------------------------------------------------------------------------------------------------------------------------------------------------------------------------------------------------------------------------------------------------------------------------------------------------------------------------------------------------------------------------------------------------------------------------------------------------------------------------------------------------------------|
| <p>Interprofessional collaboration on oral health</p> | <ul style="list-style-type: none"> <li>- What makes this difficult for you? What could help you?</li> </ul> <p>Is there collaboration with other disciplines regarding oral health for FHOP?</p> <p>With whom do you <b>collaborate</b>? How does this work? How do you experience the collaboration?</p> <ul style="list-style-type: none"> <li>- Would you like to see this done differently? In what way?</li> <li>- Is this a different form of collaboration compared to other health issues? (e.g. collaboration with GPs on high blood pressure)</li> <li>- Is the collaboration regarding FHOP different from that with other patient groups?</li> </ul> |
| <p>Information exchange</p>                           | <p>How is oral health <b>information exchanged</b> between home care workers and other primary care professionals (other home care workers, GPs, oral health professionals)?</p> <ul style="list-style-type: none"> <li>- With whom do you exchange information? How do you perceive this? Is it acceptable for you?</li> <li>- What infrastructure is needed to facilitate smoother communication between professionals?</li> <li>- What information do you find relevant to exchange with oral health professionals?</li> </ul> <p>Are you sometimes involved in multidisciplinary consultations regarding oral health?</p>                                    |
| <p>Multidisciplinary consultations</p>                | <ul style="list-style-type: none"> <li>- How do you experience this? Is it acceptable for you?</li> <li>- Are oral health professionals involved or kept informed?</li> </ul>                                                                                                                                                                                                                                                                                                                                                                                                                                                                                    |

|                    |                                                                                                                                                                                                                                                                                                                                                                                                                           |
|--------------------|---------------------------------------------------------------------------------------------------------------------------------------------------------------------------------------------------------------------------------------------------------------------------------------------------------------------------------------------------------------------------------------------------------------------------|
| Needs and barriers | Are there (any other) factors that make it difficult for you as a home nurse / home care aide to...                                                                                                                                                                                                                                                                                                                       |
| Micro level        | <ul style="list-style-type: none"> <li>- Contribute to the oral health of FHOP and collaborate effectively with other healthcare professionals on this?</li> <li>- What do you need to optimally participate in this?</li> </ul>                                                                                                                                                                                          |
| Meso level         | <p>What could encourage professional caregivers from other disciplines to collaborate effectively on oral health for this patient group?</p> <p>At the level of the practice you work in, are there any factors that make it difficult to...</p> <ul style="list-style-type: none"> <li>- Contribute to the oral health of FHOP?</li> <li>- Collaborate optimally with other healthcare professionals on this?</li> </ul> |
| Macro level        | <p>What barriers do you see at the policy level that hinder effective collaboration on this?</p> <ul style="list-style-type: none"> <li>- What is needed at the level of our healthcare system?</li> <li>- Do you see potential initiatives to optimise interprofessional collaboration on this issue?</li> </ul>                                                                                                         |
| Ideal organisation | One final question to conclude: How should oral health care for frail home-dwelling older people ideally be organised, in your opinion?                                                                                                                                                                                                                                                                                   |
| End                | Thanking the participants for their involvement and inquiring whether they know of other potential participants themselves.                                                                                                                                                                                                                                                                                               |
